# Supplementary material for: The cost of antibiotic resistance depends on evolutionary history in Escherichia coli
Source: PubMed Central journal article supplement (PMC3751127; doi:10.1186/1471-2148-13-163), 2013-08-02
Supplement: 1471-2148-13-163-S1.pdf [file 1471-2148-13-163-S1.pdf]

**TABLE S1. Relative fitness of all genotypes.**

Fitness was measured by competition assays against the wild type.

Rifampicin-resistance (Rif<sup>R</sup>) mutations are given by their amino acid changes on *rpoB*; additional resistance elements (Str<sup>R</sup> or Sul<sup>R</sup>+Str<sup>R</sup>) are given either as amino acid changes on *rpsL* (K43N or K88R) or RSF1010 for the plasmid.

Independently generated isolates of the wild type (evolved in LB or with additional resistance elements) are denoted *a-c* in *Genotype name*. Scores are mean  $\pm$ s.e. from three independent replicates, or nine replicates across three blocks for genotypes with no additional resistance elements, and 27 replicates across three blocks of assays for the wild type. For WTc+K43N data are from one competition assay.

| Genotype name     | Rif <sup>R</sup><br>mutation | Evolved<br>in LB | Additional <sup>R</sup><br>element | Fitness | s.e. |
|-------------------|------------------------------|------------------|------------------------------------|---------|------|
| D516G+K88R        | D516G                        | no               | K88R                               | 0.90    | 0.03 |
| D516G             | D516G                        | no               | none                               | 0.98    | 0.03 |
| D516G+plasmid     | D516G                        | no               | RSF1010                            | 0.91    | 0.02 |
| D516G_evo+K88R    | D516G                        | yes              | K88R                               | 1.06    | 0.00 |
| D516G_evo         | D516G                        | yes              | none                               | 1.09    | 0.01 |
| D516G_evo+plasmid | D516G                        | yes              | RSF1010                            | 1.15    | 0.01 |
| I572S+K43N        | I572S                        | no               | K43N                               | 0.94    | 0.01 |
| I572S             | I572S                        | no               | none                               | 1.07    | 0.02 |
| I572S+plasmid     | I572S                        | no               | RSF1010                            | 1.06    | 0.00 |
| I572S_evo+K43N    | I572S                        | yes              | K43N                               | 1.02    | 0.01 |
| I572S_evo+K88R    | I572S                        | yes              | K88R                               | 1.09    | 0.01 |
| I572S_evo         | I572S                        | yes              | none                               | 1.11    | 0.02 |
| I572S_evo+plasmid | I572S                        | yes              | RSF1010                            | 1.18    | 0.01 |
| S512F+K43N        | S512F                        | no               | K43N                               | 0.81    | 0.01 |
| S512F+K88R        | S512F                        | no               | K88R                               | 0.93    | 0.02 |
| S512F             | S512F                        | no               | none                               | 0.98    | 0.02 |
| S512F+plasmid     | S512F                        | no               | RSF1010                            | 1.00    | 0.01 |
| S512F_evo+K43N    | S512F                        | yes              | K43N                               | 0.95    | 0.01 |
| S512F_evo+K88R    | S512F                        | yes              | K88R                               | 1.09    | 0.01 |
| S512F_evo         | S512F                        | yes              | none                               | 1.10    | 0.02 |
| S512F_evo+plasmid | S512F                        | yes              | RSF1010                            | 1.15    | 0.02 |
| WTa+K43N          | none                         | no               | K43N                               | 0.82    | 0.01 |

|                 |      |     |         |      |      |
|-----------------|------|-----|---------|------|------|
| WTb+K43N        | none | no  | K43N    | 0.81 | 0.01 |
| WTc+K43N        | none | no  | K43N    | 0.86 |      |
| WTa+K88R        | none | no  | K88R    | 1.00 | 0.01 |
| WTb+K88R        | none | no  | K88R    | 0.99 | 0.02 |
| WT              | none | no  | none    | 1.00 | 0.01 |
| WTa+plasmid     | none | no  | RSF1010 | 0.98 | 0.00 |
| WTb+plasmid     | none | no  | RSF1010 | 0.97 | 0.01 |
| WTc+plasmid     | none | no  | RSF1010 | 1.02 | 0.03 |
| WTa_evo+K43N    | none | yes | K43N    | 1.04 | 0.00 |
| WTb_evo+K43N    | none | yes | K43N    | 1.03 | 0.02 |
| WTc_evo+K43N    | none | yes | K43N    | 1.04 | 0.01 |
| WTa_evo+K88R    | none | yes | K88R    | 1.09 | 0.01 |
| WTb_evo+K88R    | none | yes | K88R    | 1.07 | 0.01 |
| WTc_evo+K88R    | none | yes | K88R    | 1.08 | 0.01 |
| WTa_evo         | none | yes | none    | 1.11 | 0.01 |
| WTb_evo         | none | yes | none    | 1.08 | 0.01 |
| WTc_evo         | none | yes | none    | 1.13 | 0.01 |
| WTa_evo+plasmid | none | yes | RSF1010 | 1.16 | 0.01 |
| WTb_evo+plasmid | none | yes | RSF1010 | 1.12 | 0.01 |
| WTc_evo+plasmid | none | yes | RSF1010 | 1.18 | 0.01 |
